# Supplementary material for: NAMPT overexpression induces cancer stemness and defines a novel tumor signature for glioma prognosis
Source: PubMed Central journal article supplement (PMC5725111; doi:10.18632/oncotarget.20577), 2017-08-28
Supplement: oncotarget-08-99514-s001.pdf [file oncotarget-08-99514-s001.pdf]

## NAMPT overexpression induces cancer stemness and defines a novel tumor signature for glioma prognosis

### SUPPLEMENTARY MATERIALS

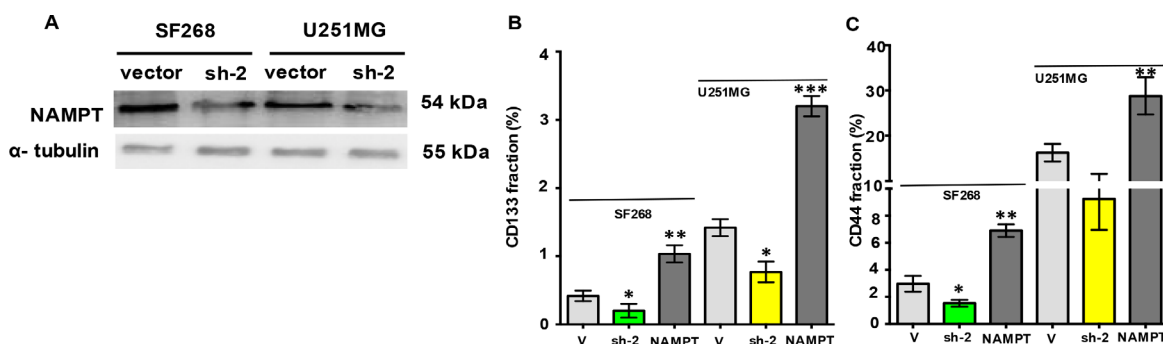

**Supplementary Figure 1: CICs related features associated to the causal effect of a second sh expressed on SF268 and U251MG cell lines.** We show similar results to the sh-1 using a sh-2 (A) in CICs related properties such CD44 and CD133 levels. (B) Effect of the second independent Nampt-shRNA on the CD133 positive pool of cells in the population of the cell lines analyzed. CD133 analysis with FACS indicates that NAMPT overexpression increases CD133 levels [ $*p < 0.05$  with ANOVA compared to vector], whereas NAMPT underexpression decreases CD133 levels [ $**p < 0.01$  with ANOVA compared to vector]. Complementary to Figure 3L. (C) Effect of the second independent Nampt-shRNA on the CD44 positive pool of cells in the population of the cell lines analyzed. CD133 analysis with FACS indicates that NAMPT overexpression increases CD44 levels [ $*p < 0.05$  with ANOVA compared to vector], whereas NAMPT underexpression decreases CD44 levels [ $**p < 0.01$  with ANOVA compared to vector]. Complementary to figure 3M.

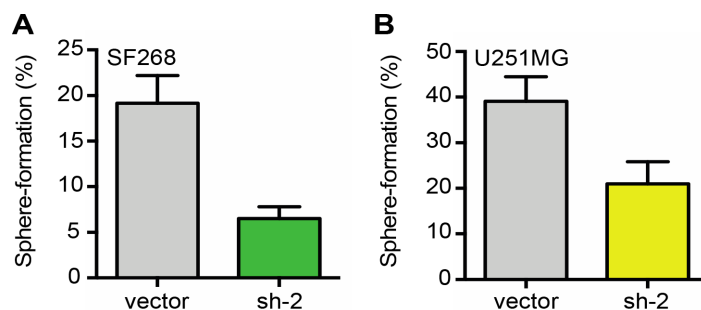

**Supplementary Figure 2: Sphere-forming efficiency associated to the causal effect of a second sh expressed on SF268 and U251MG cell lines.** We show similar results to the sh-1 using a second sh-2 against NAMPT. We measured the sphere-forming capacity from a single cell on SF268 (A) and U251MG (B) showing similar results to the sh-1

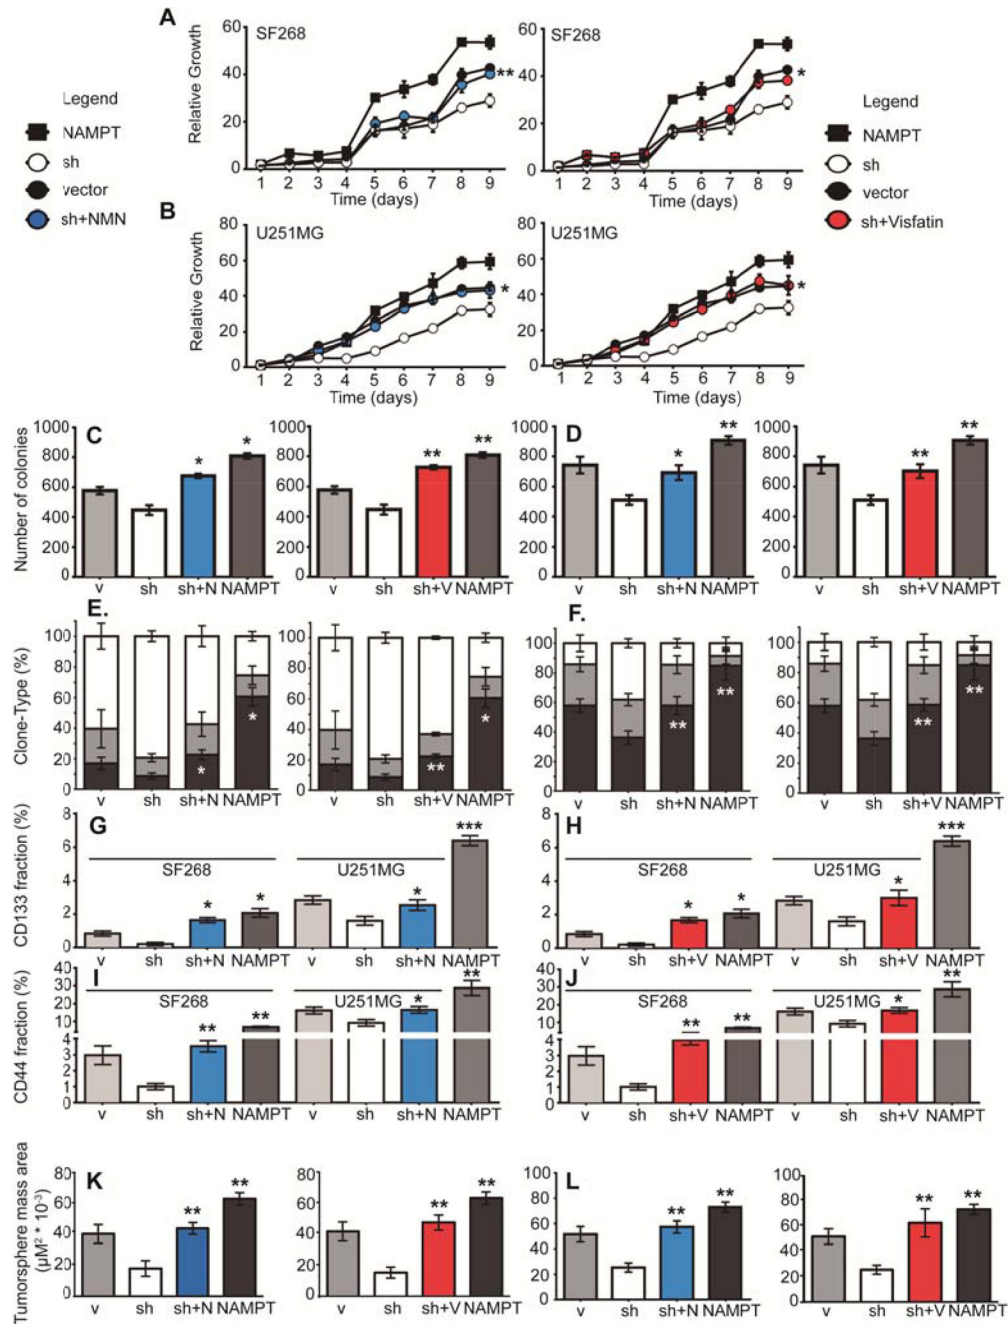

**Supplementary Figure 3: NAMPT-driven tumorigenic and CIC properties are rescued both metabolically and enzymatically.** (A) left - Analysis of the growth curve for SF268 NAMPT-underexpressing cells indicates that 1 mM NMN can rescue the vector-proliferation ratio [ $**p < 0.01$  with ANOVA compared to sh]. right - 60 ng/mL visfatin has the same effect [ $*p < 0.05$  with ANOVA compared to sh]. (B) Same results described for U251MG [ $*p < 0.05$  with ANOVA compared to sh] (C) left - Analysis of clonogenicity in SF268 NAMPT-underexpressing cells indicates that 1 mM NMN can rescue the clonogenic ability of the vector [ $*p < 0.05$  with ANOVA compared to sh] right - 60 ng/mL visfatin has the same effect [ $**p < 0.01$  ANOVA compared to sh]. (D) Same results described for U251MG [ $*p < 0.05$ ;  $**p < 0.01$  with ANOVA compared to sh] (E) Analysis of clone phenotypes in NAMPT- underexpressing cells indicates that 1 mM NMN [ $*p < 0.05$ ;  $**p < 0.01$  with ANOVA compared to sh] and (F) 60 ng/mL visfatin [ $**p < 0.01$  with ANOVA compared to sh] can rescue the number of holoclones in the vector in both cell lines. (G) CD133 analysis of SF268 and U251MG NAMPT-underexpressing cells indicates that 1 mM NMN [ $*p < 0.05$ ;  $***p < 0.001$  with ANOVA comparison to sh] and (H) 60 ng/mL visfatin [ $*p < 0.05$ ;  $***p < 0.001$  with ANOVA compared to sh] can rescue and surpass the levels of CD133 expression in the vector of both cell lines. (I) CD44 analysis of low SF268 and U251MG NAMPT cells indicates that 1 mM NMN [ $*p < 0.05$ ;  $**p < 0.01$ ;  $***p < 0.001$  with ANOVA compared to sh] and (J) 60 ng/mL visfatin [ $*p < 0.05$ ;  $**p < 0.01$  with ANOVA compared to sh] can rescue the levels of CD44 expression in the vector of both cell lines. (K) left - Analysis of tumorsphere area in SF268 NAMPT-underexpressing cells indicates that 1 mM NMN [ $**p < 0.01$  with ANOVA compared to sh] and (K) - right 60 ng/mL visfatin [ $**p < 0.01$  with ANOVA compared to sh] can rescue the number of tumorspheres generated in the vector. (L) Similar results described for U251MG. V: cells expressing vector only. NAMPT: Cells overexpressing ectopic NAMPT cDNA, Sh: cells expressing an specific NAM shRNA.

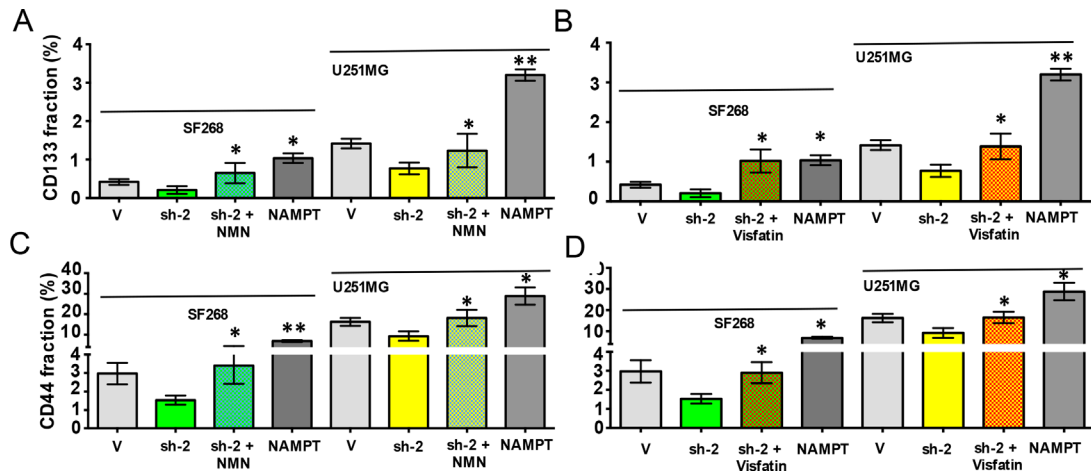

Supplementary Figure 4: NAMPT-driven tumorigenic and CIC properties are rescued both metabolically and enzymatically, using a second shRNA.

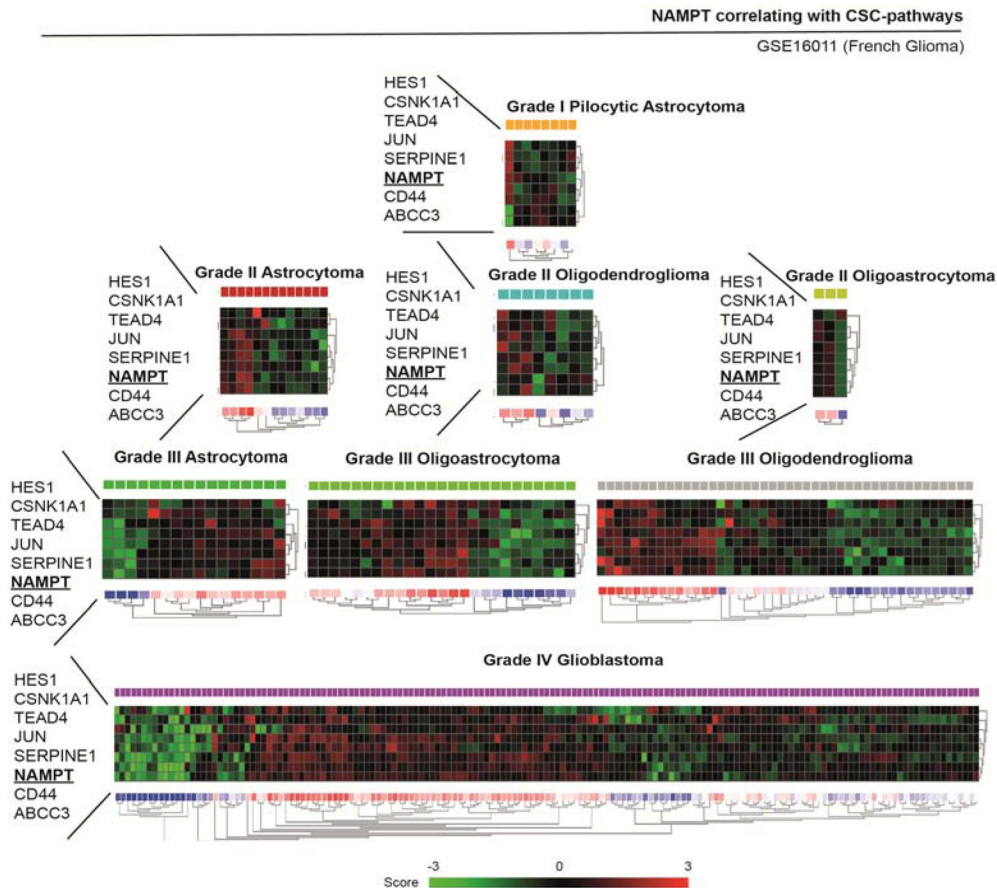

Supplementary Figure 5: Analysis of GSE16011 (French Database) of glioma tumors. Figure shows heat map of selected patients according to tumor grade. In the heat maps, tumors are distributed according to the Nampt-derived signature.

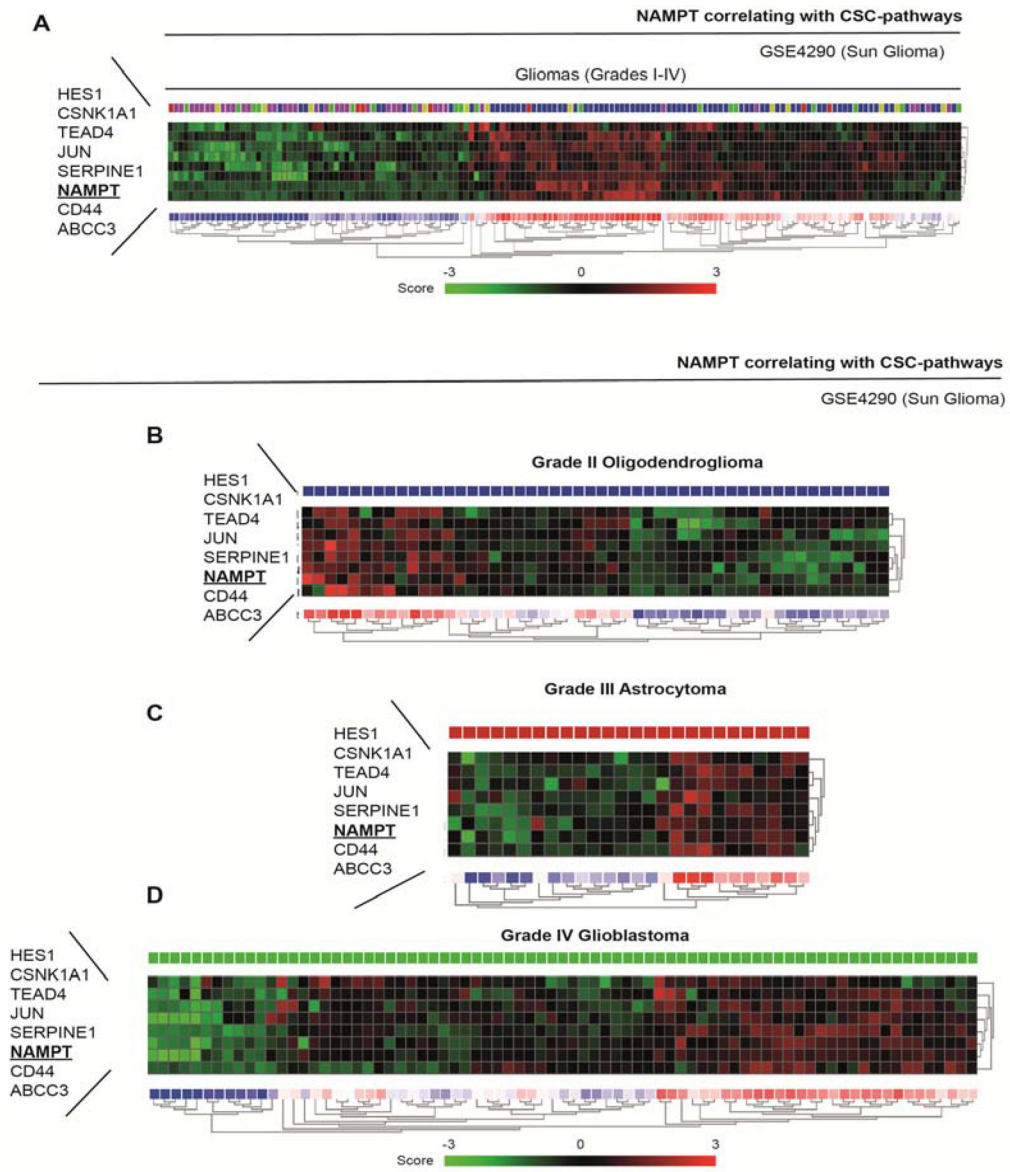

**Supplementary Figure 6: Analysis of GSE4290 (Sun Database) of glioma tumors.** Figure shows heat map of selected patients according to tumor grade. In the heat maps, tumors are distributed according to the Nampt-derived signature.



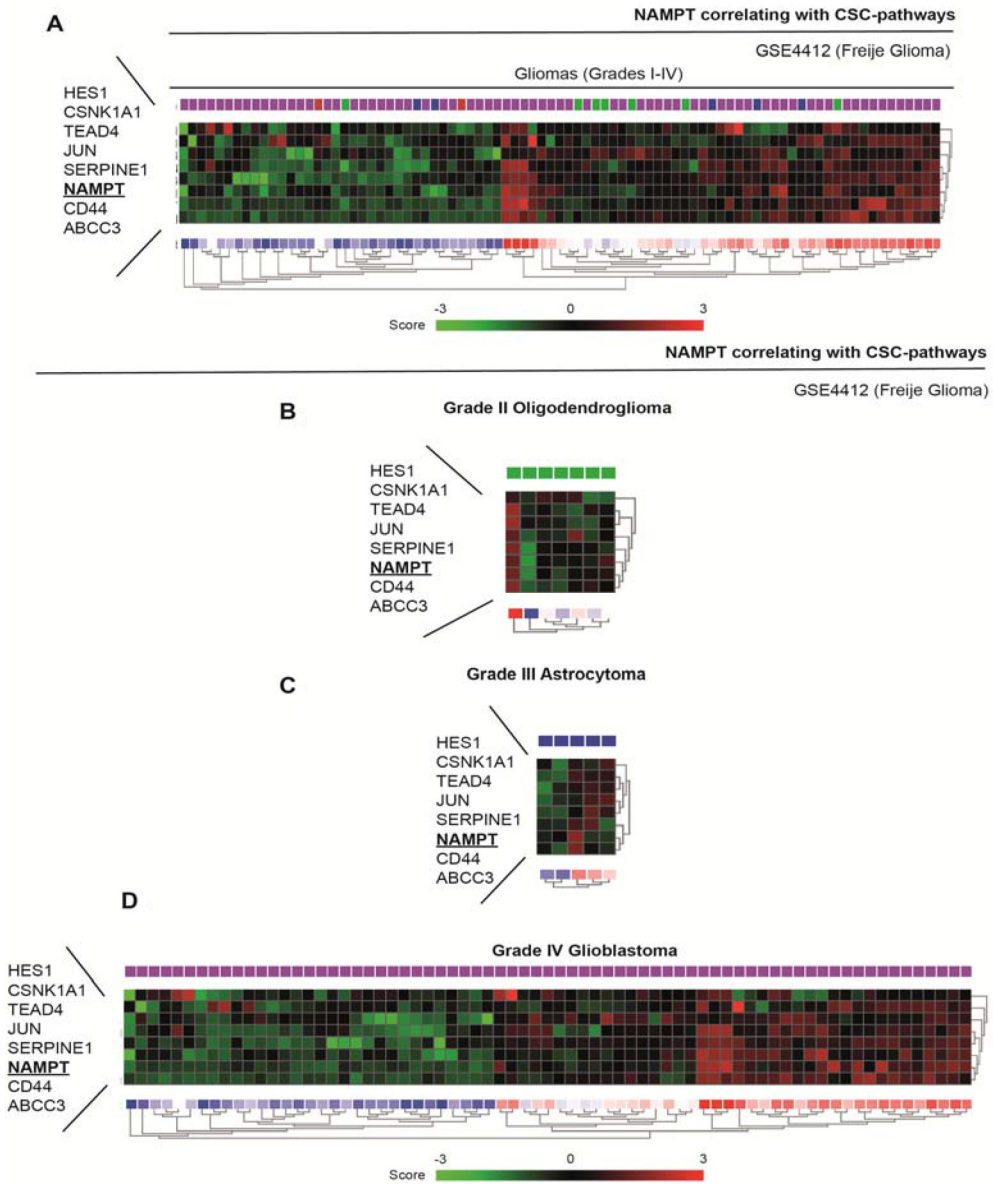

**Supplementary Figure 7: Analysis of GSE4412 (Freije Database) of glioma tumors.** Figure shows heat map of selected patients according to tumor grade. In the heat maps, tumors are distributed according to the Nampt-derived signature.

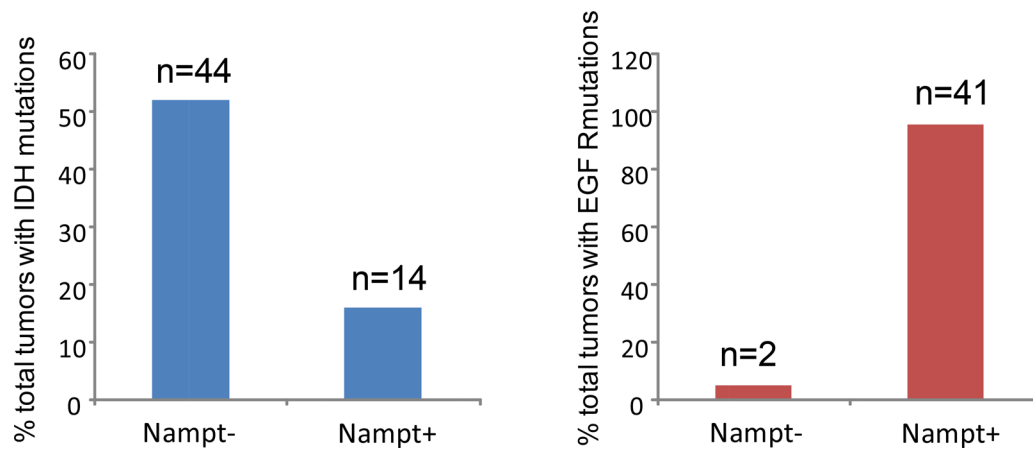

**Supplementary Figure 8: Percentage of total tumors with mutations in IDH1 or EGFR mutations or amplifications according to NAMPT levels (Based on figure 8 database).**

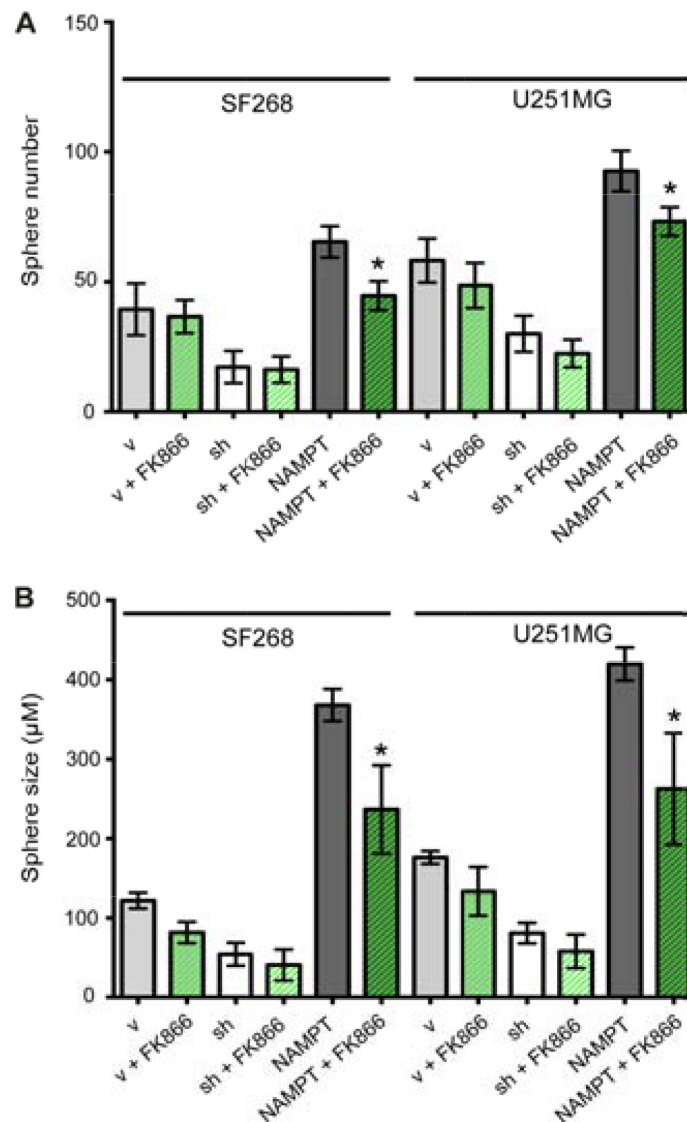

**Supplementary Figure 9: The graph shows the average of number of spheres after 4 days of the treatment (+ Std Dev). Treatment indicated was at single dose only (IC50). In this data we can observe a reduction in the number of spheres specifically, indicating the effectivity of the inhibition in targeting CICs. (\*= $p < 0.05$ ).**

**Supplementary Table 1: Molecular diagnosis of patient gliomas used for experiments of Figure 4E**

| <b>Sample</b> | <b>Molecular Diagnosis (WHO 2016)</b> |
|---------------|---------------------------------------|
| G002          | Glioblastoma grade IV IDH1 wild type  |
| G003          | Glioblastoma grade IV NOS             |
| G003          | Glioblastoma grade IV IDH1 wild type  |
| G004          | Anaplastic astrocytoma Grade III NOS  |
| G006          | Glioblastoma grade IV IDH1 wild type  |
